# Supplementary material for: Strain-Dependent Morphology of Reactive Astrocytes in Human- and Animal-Vole-Adapted Prions
Source: MDPI journal article supplement (doi:10.3390/biom13050757), 2023-04-27
Supplement: s1 [file s1]

Supplementary materials of:

**Strain-Dependent Morphology of Reactive Astrocytes in Human- and Animal-Vole-Adapted Prions**

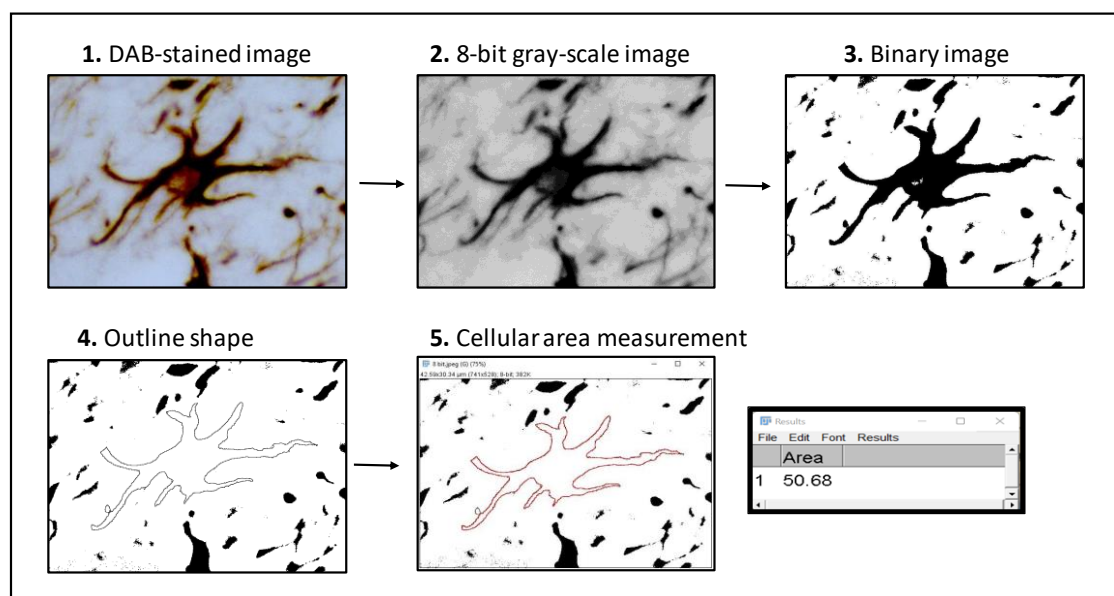

**Figure S1: Progressive representation of Fiji protocol developed to measure the cellular area starting from a DAB-stained image.**

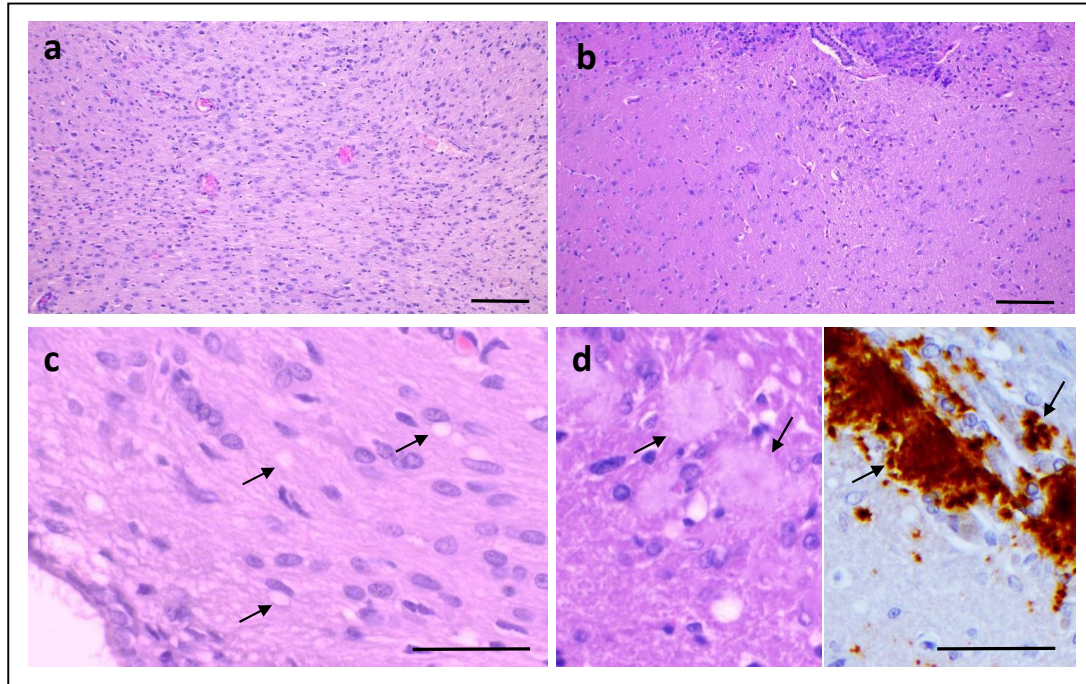

**Figure S2 - Specific neuropathological features of sCJD-MM2T, GSS-A117V and sCJD-VV2.** Haematoxylin and eosin staining highlighted thalamic atrophy in sCJD-MM2T (a) in comparison to the thalamus of mock-inoculated vole (b) (scale bars, 50  $\mu$ m); (c) small vacuoles in corpus callosum of GSS-A117V (scale bar, 20  $\mu$ m); (d) (d) panel with haematoxylin and eosin (left) and immunohistochemistry (right) of plaques accumulated in the alveus of vole infected with sCJD-VV2 (scale bar, 20  $\mu$ m).

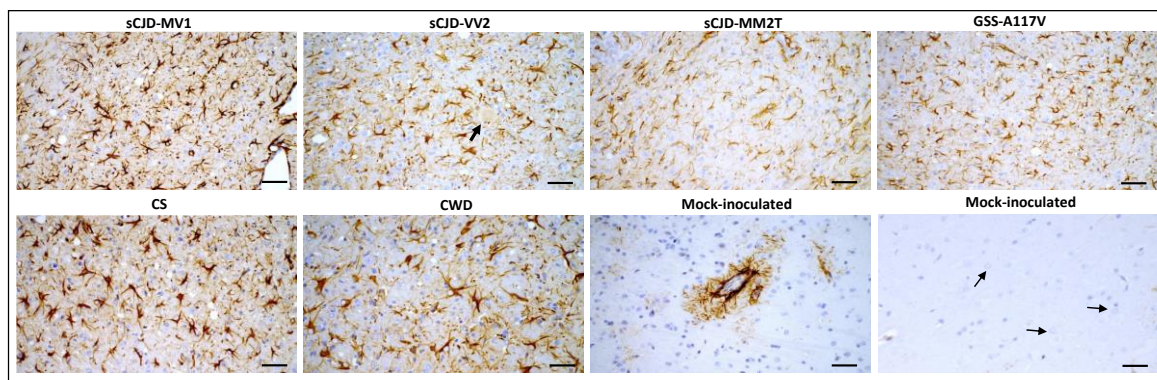

**Figure S3 - Immunohistochemical detection of GFAP in MDTN of selected vole-adapted prion strains.** Prominent astrogliosis affected all prion-infected vole brains. In sCJD-VV2, amyloid plaque encircled by few astrocytes is detected in the neuropil (arrow). In the thalamus of mock-inoculated voles, few astrocytic processes surrounding blood vessels are visible, while any GFAP immunolabelling is associated with astrocyte cellular bodies scattered within thalamic parenchyma. Scale bars, 20  $\mu$ m.

| Strain    | Vole ID | Number of astrocytes | Mean of cellular area ( $\mu\text{m}^2$ ) | Standard Deviation | Prob>f (Anova) |
|-----------|---------|----------------------|-------------------------------------------|--------------------|----------------|
| sCJD-MM2T | #1      | 12                   | 23.85                                     | 3.89               | 0.0016         |
|           | #2      | 4                    | 18.81                                     | 3.14               |                |
|           | #3      | 9                    | 17.46                                     | 3.33               |                |
| GSS-A117V | #1      | 15                   | 23.55                                     | 4.20               | 0.3001         |
|           | #2      | 5                    | 20.70                                     | 3.20               |                |
|           | #3      | 6                    | 23.67                                     | 3.44               |                |
| sCJD-MV1  | #1      | 10                   | 32.92                                     | 4.28               | 0.0529         |
|           | #2      | 11                   | 34.62                                     | 3.79               |                |
|           | #3      | 6                    | 38.38                                     | 4.20               |                |
|           | #4      | 8                    | 32.95                                     | 3.53               |                |
| sCJD-VV2  | #1      | 4                    | 31.34                                     | 1.30               | 0.0124         |
|           | #2      | 5                    | 39.33                                     | 8.36               |                |
|           | #3      | 7                    | 40.22                                     | 6.81               |                |
|           | #4      | 4                    | 27.43                                     | 3.33               |                |
| CS        | #1      | 21                   | 38.85                                     | 5.29               | 0.1889         |
|           | #2      | 5                    | 35.09                                     | 5.78               |                |
|           | #3      | 4                    | 33.29                                     | 3.17               |                |
|           | #4      | 12                   | 35.98                                     | 6.06               |                |
|           | #5      | 7                    | 39.58                                     | 5.92               |                |
| CWD       | #1      | 10                   | 45.26                                     | 4.70               | 0.1183         |
|           | #2      | 6                    | 49.54                                     | 8.89               |                |
|           | #3      | 3                    | 57.57                                     | 11.53              |                |
|           | #4      | 3                    | 50.31                                     | 7.75               |                |

**Table S1 – Dataset of cellular areas of astrocytes in prion strains investigated.** Table includes: i) number of animals per strain; ii) astrocytes per vole analyzed for each strain; iii) the mean values  $\pm$  standard deviation of the cellular area obtained from every single animal; iv) and results of one-way parametric ANOVA. Medium-high consistency was observed among voles inoculated with the same strain, except for sCJD-VV2 and sCJD-MM2T, for which between-subject variability was found.
